# Supplementary material
Source: PubMed Central journal article supplement (PMC5055137)
Supplement: BPH-173-2845-s001.pdf [file BPH-173-2845-s001.pdf]

## Supplemental Data

Methods associated with animal model preparation and other parameters measured in addition to those described below are provided in the main paper.

### Urine Chemistries and Renal Biomarkers

For urine based assessments, 18 h urine samples were collected before dosing and after the highest dose to determine effects of baclofen on urine chemistries and drug-induced renal biomarkers of injury.

Urine appearance and physical characteristics (color, clarity, total volume and pH) of samples collected on Day -1 and Day 1 were recorded. Urine constituents (bilirubin, ketone, occult blood, and urobilinogen) were semi-quantitatively measured using standard dipstick technology (Siemens; New York, NY). For standard urinalysis, specimens were centrifuged at 604xg for 10 min. Baseline urine chemistry parameters (urea nitrogen, creatinine, phosphorus, and total protein), electrolytes (sodium, potassium, chloride, and calcium) were analyzed using a Hitachi® clinical chemistry analyzer (Tokyo, Japan). Renal biomarkers of injury were also evaluated using Meso Scale Diagnostic multiplex kits (Gaithersburg, MD) with results reported as a ratio to urine creatinine. Biomarkers measured included: Kidney Injury Molecule (KIM-1), albumin, alpha glutathione S-transferase ( $\alpha$ -GST), mu gamma glutathione S-transferase-yb1 (GSTY $\beta$ 1), lipocalin, renal papillary antigen-1 (RPA-1), clusterin and osteopontin (OPN).

### Plasma Chemistries

At the end of the study, animals were humanely sacrificed and blood collected to determine effects of baclofen on plasma chemistries.

### Data Analysis

Urine electrolytes, urine chemistries, blood chemistry parameters, and biomarkers of drug induced kidney injury data were normalized to baseline (pre treatment) as a ratio then log transformed. The Student's t-test was applied to these log transformed parameters at time points indicated for comparisons (Baclofen versus vehicle). Tabular data are presented as fold changes normalized to baseline (defined as data sampled from -2 – 0 h) and subsequently compared to vehicle. Graphical data are presented as raw data without baseline correction.

## Results

### Plasma Chemistry and Urinalysis

Baclofen decreased levels of blood triglycerides by 40% compared to vehicle-treated rats (Supplemental Table 1) but had no effect on other blood chemistries. Baclofen also significantly ( $P>0.05$ ) increased urine volume (220%), decreased osmolarity (-50%), decreased potassium (-14%) and total protein (-40%) compared to vehicle (Supplemental Table 2).

### Drug-Induced Kidney Injury Biomarkers

Baclofen induced a significant 2-fold increase in clusterin compared to vehicle-treated animals, a change not considered physiologically significant (Supplemental Table 3). There were no other significant changes in all other measured parameters.

**Supplemental Table S1. Plasma Chemistries**

| <b>Plasma Chemistry Biomarker</b> | <b>Vehicle</b> | <b>Baclofen</b> | <b>P value</b> |
|-----------------------------------|----------------|-----------------|----------------|
| Albumin/Globulin Ratio            | 1.3 ± 0.2      | 1.5 ± 0.1       | NS             |
| Cholesterol                       | 65 ± 5.5       | 65.6 ± 7.5      | NS             |
| Albumin                           | 2.8 ± 0.1      | 2.9 ± 0.2       | NS             |
| Alanine AminoTransferase          | 26 ± 2.4       | 24.8 ± 2.8      | NS             |
| Alkaline Phosphatase              | 90 ± 38.5      | 83.2 ± 12.1     | NS             |
| Aspartate Transferase             | 82 ± 2.5       | 74.6 ± 3.1      | NS             |
| Total bilirubin                   | 0.1 ± 0.04     | 0.06 ± 0.03     | NS             |
| Serum calcium                     | 10.2 ± 0.4     | 9.5 ± 0.6       | NS             |
| Serum creatinine                  | 0.3 ± 0.03     | 0.3 ± 0.03      | NS             |
| Serum glucose                     | 164.7 ± 2.7    | 178.6 ± 15.2    | NS             |
| Total protein                     | 5 ± 0.2        | 4.9 ± 0.4       | NS             |
| Triglycerides                     | 90 ± 5.8       | 43.8 ± 9.4      | *              |
| Blood urea nitrogen               | 18.7 ± 3.3     | 17.6 ± 1.4      | NS             |
| Serum sodium                      | 144 ± 2.5      | 137 ± 6         | NS             |
| Serum potassium                   | 4.1 ± 0.4      | 3.8 ± 0.2       | NS             |
| Serum chloride                    | 103.4 ± 2.3    | 98.5 ± 4.5      | NS             |
| Serum phosphate                   | 6.6 ± 0.4      | 6.5 ± 0.4       | NS             |
| Glutamate dehydrogenase           | 9.7 ± 0.4      | 8.8 ± 0.5       | NS             |
| Globulin                          | 2.2 ± 0.2      | 2 ± 0.2         | NS             |
| Serum osmolality                  | 307 ± 0.7      | 312.2 ± 8.3     | NS             |

\* p<0.05 vs. time-matched vehicle; NS, not significant

**Supplemental Table S2. Urine analysis**

| Urinary Chemistry Biomarker | Vehicle      | Baclofen     | P value |
|-----------------------------|--------------|--------------|---------|
| Sodium                      | 54 ± 1       | 47.8 ± 4.1   | NS      |
| Potassium                   | 37.3 ± 3.8   | 32.9 ± 1.7   | **      |
| Chloride                    | 65.4 ± 6.7   | 47 ± 4.1     | **      |
| Glucose (mg/dL)             | 1.1 ± 0.7    | 0.8 ± 0.3    | NS      |
| Protein (g/dL)              | 226.7 ± 49.7 | 206.2 ± 43.7 | **      |
| N acetyl glucosamine        | 2.1 ± 0.47   | 2.0 ± 0.2    | NS      |
| Alanine phosphatase         | 0.3 ± 0.1    | 0.05 ± .05   | NS      |
| Lactate dehydrogenase       | 10.7 ± 1.5   | 10.5 ± 0.4   | NS      |
| Gamma-glutamyltransferase   | 0.3 ± 0.1    | 0.2 ± 0.2    | NS      |
| Volume (mL)                 |              |              | *       |
| Osmolarity                  |              |              | *       |

\* p<0.05; \*\* p<0.005 vs. time-matched vehicle; NS, not significant

**Supplemental Table S3. Biomarkers of Kidney Injury**

| Kidney Injury Biomarkers                   | Vehicle     | Baclofen      | p value |
|--------------------------------------------|-------------|---------------|---------|
| Alpha Glutathione S-Transferase (ng/mg Cr) | 1.4 ± 0.3   | 2.8 ± 1.0     | NS      |
| Glutathione S-Transferase. Yb1 (ng/mg Cr)  | 0.9 ± 0.7   | 0.5 ± 0.2     | NS      |
| Renal papillary antigen(U/mg Cr)           | 19.2 ± 6.7  | 15.1 ± 5.2    | NS      |
| Clusterin (U/mg Cr)                        | 0.16 ± 0.06 | 0.41 ± 0.2    | *       |
| Albumin (ng/mg Cr)                         | 511.8 ± 85  | 858.6 ± 401.2 | NS      |
| Lipocaln (ng/mg Cr)                        | 37.8 ± 8.6  | 25.6 ± 4.9    | NS      |
| Osteopontin (ng/mg Cr)                     | 0.08 ± 0.02 | 0.08 ± 0.03   | NS      |
| Kidney injury molecule-1 (ng/mg Cr)        | 0.14 ± 0.04 | 0.09 ± 0.03   | NS      |

\* p<0.05 vs. time-matched vehicle; NS, not significant
